# Supplementary material
Source: Research Square preprint supplement (doi:10.21203/rs.3.rs-9567838/v1)
Supplement: Supplementary file 1 [file 5af074c00ec1fee3ff7b1c27.pdf]

# Supplementary Information for Transitional calcite-aragonite stacking as a signature of hexagonal aragonite in biogenic and inorganic deposits

## Author Information

Péter Németh<sup>1,2\*</sup>, Attila Demény<sup>1</sup>, Péter Pekker<sup>2,3</sup>, Aleksander Rečnik<sup>4</sup>, Vesna Ribić<sup>4</sup>, Pavel N. Gavryushkin<sup>5,6</sup>, Maksim Banaev<sup>5,6</sup>, Marco Bruno<sup>7</sup>, Christoph Spötl<sup>8</sup>, Michael Pettau<sup>9</sup>, Martin Dietzel<sup>9</sup>, Levente Illés<sup>10</sup>, Mihály Pósfai<sup>2,3</sup>

## Affiliations

<sup>1</sup> Institute for Geological and Geochemical Research, HUN-REN REN Research Centre for Astronomy and Earth Sciences (MTA Centre of Excellence), Budapest, Hungary

<sup>2</sup> Research Institute of Biomolecular and Chemical Engineering, University of Pannonia, Veszprém, Hungary

<sup>3</sup> HUN-REN-PE Environmental Mineralogy Research Group, Veszprém, Hungary

<sup>4</sup> Department for Nanostructured Materials, Jožef Stefan Institute, Ljubljana, Slovenia

<sup>5</sup> V.S. Sobolev Institute of Geology and Mineralogy, Siberian Branch of Russian Academy of Sciences, Novosibirsk, Russia

<sup>6</sup> Novosibirsk State University, Novosibirsk, Russia

<sup>7</sup> Department of Earth Sciences, University of Turin, Turin, Italy

<sup>8</sup> Institute of Geology, University of Innsbruck, Innsbruck, Austria

<sup>9</sup> Institute of Applied Geosciences, Graz University of Technology, Graz, Austria

<sup>10</sup> Institute of Technical Physics and Materials Science, HUN-REN Centre for Energy Research, Budapest, Hungary.

Correspondence to: \*Péter Németh, nemeth.peter@csfk.org

## This PDF file includes:

**Fig. S1a, b, c, d: Localities and sample collection sites**

**Fig. S2a, b, c: Optical microscope, SEM and STEM images from Berger-Károly cave.**

**Fig. S3: BFTEM image of the FIB lamella obtained from the calcite-aragonite boundary (Berger-Károly cave).**

**Fig. S4: (001) aragonite SFs viewed along aragonite [1-10] (Berger Károly cave).**

**Fig. S5: (001) aragonite SFs from Sonnenberg.**

**Fig. S6: Defect-free aragonite from Erzberg.**

**Fig. S7: BFTEM image and SAED patterns of the first grown aragonite and last grown calcite from TEM2 lamella shown in Fig. 1E.**

38 **Fig. 8. Starting models of a (001) aragonite SF, built by insertion of various aragonite**  
39 **(V04.1, V05.1, V05.2) and calcite (V06) slabs.**

40 **Fig. S9: DFT-calculated structure models of two (001) aragonite SFs, built by insertion of**  
41 **various aragonite (V04.1, V05.1, V05.2) and calcite (V06) slabs.**

42

43 **Supplementary Table 1. Stable carbon and oxygen isotope compositions (in ‰ relative to**  
44 **V-PDB) of the L-top sample collected at the Berger Károly Cave<sup>14</sup>, the Sonnenberg**  
45 **(LAS34b<sup>47</sup>) and the Erzberg<sup>15</sup> samples.**

46

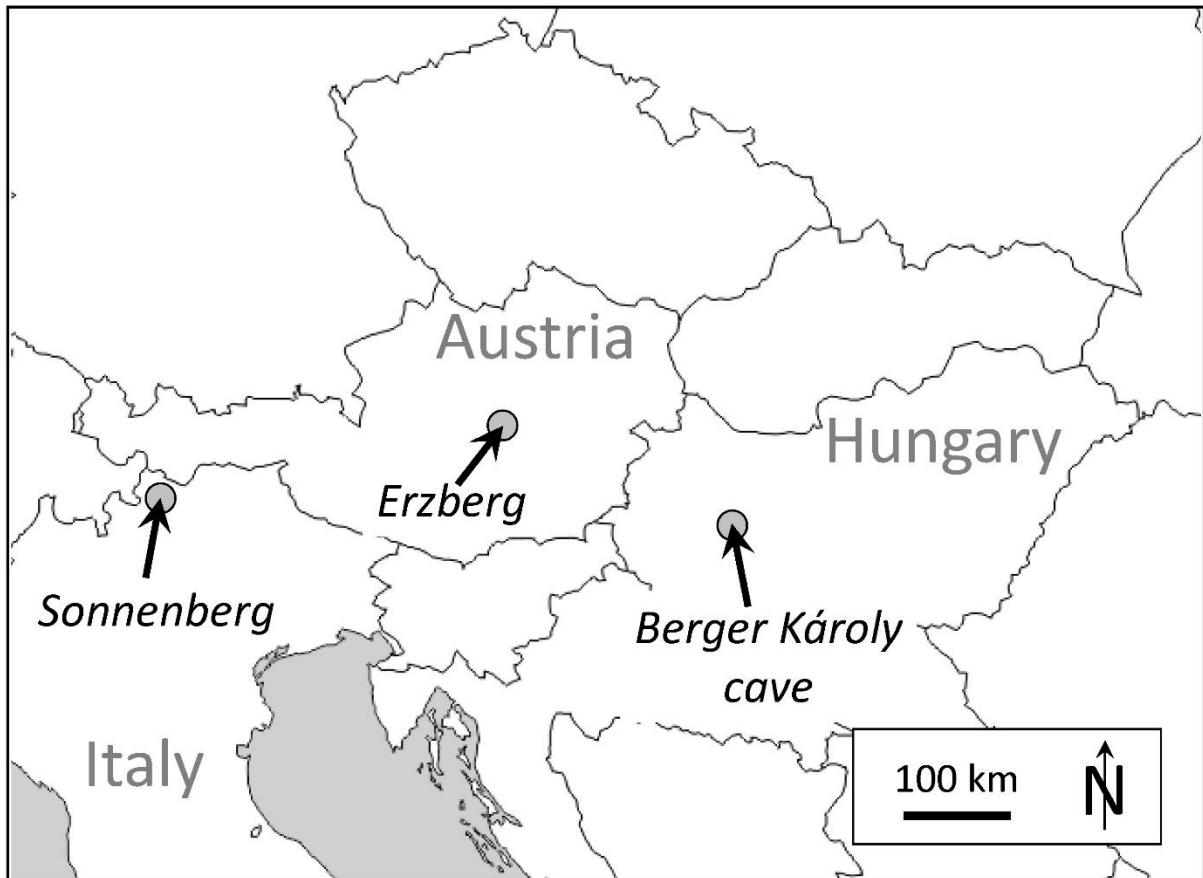

47

48 **Fig. S1a. Localities of the sample collection sites.**

49

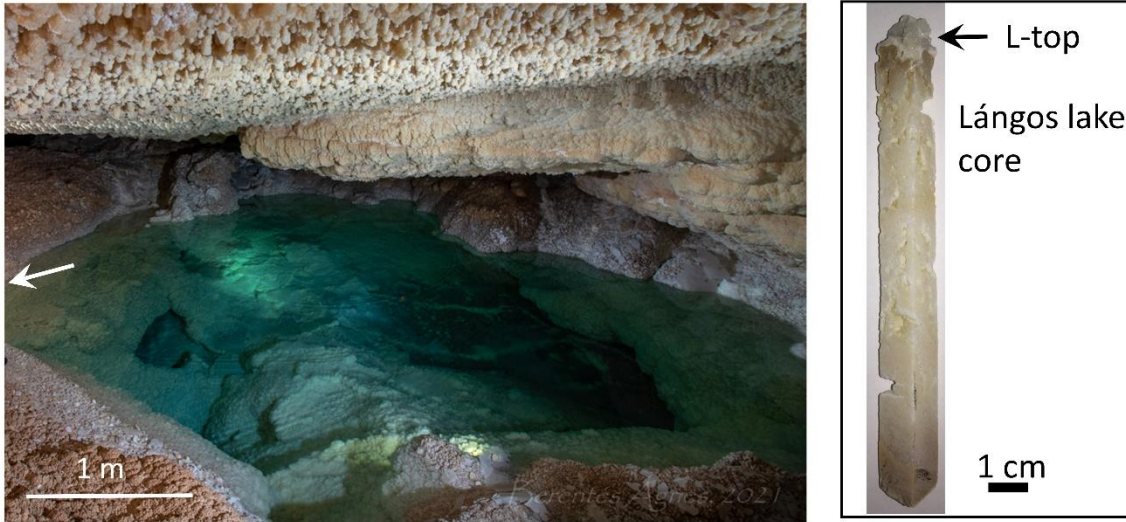

50

51 **Fig. S1b. Lángos Lake in the Berger Károly Cave.** The L-top sample was drilled into the  
52 calcite deposit covering this pool (marked by a white arrow). The drill core contains mainly  
53 dense calcite, covered by microbial calcite encrustation, an aragonite layer, and a final calcite  
54 layer (see also Fig. S2).

55

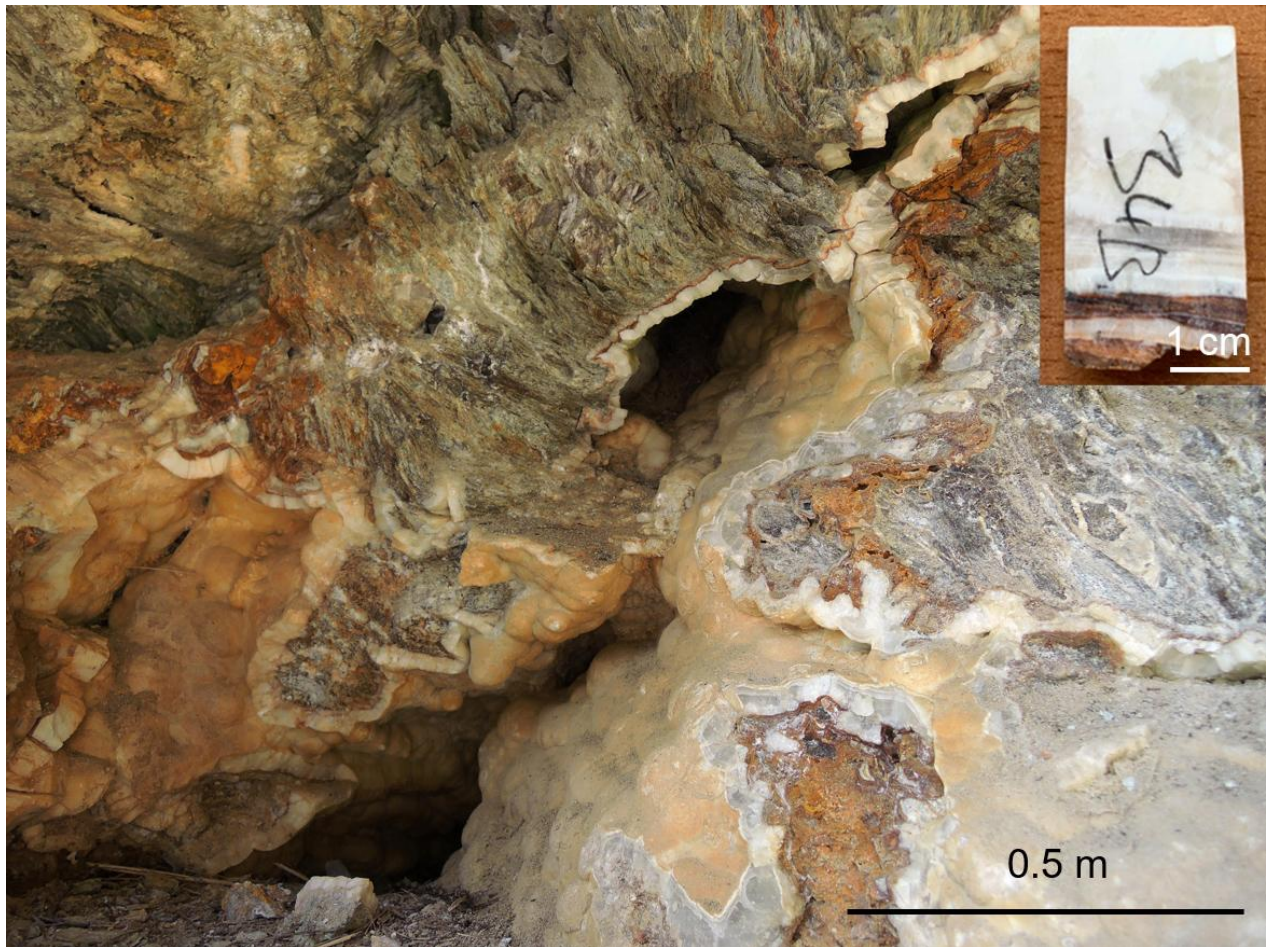

56  
57  
58  
59

**Fig. S1c. Calcite-aragonite flowstone in an extensional fracture at the Sonnenberg site (Italy) where sample LAS34 was obtained. Inset: detail of sample LAS34.**

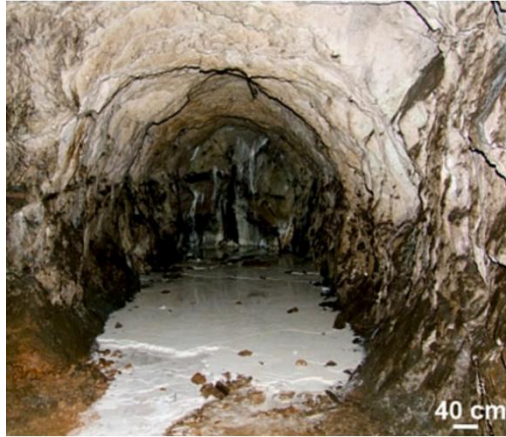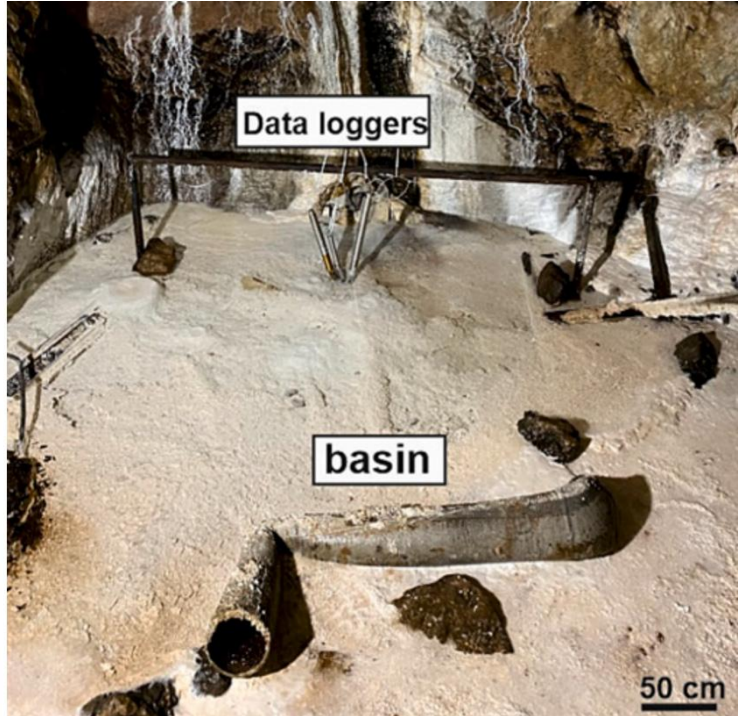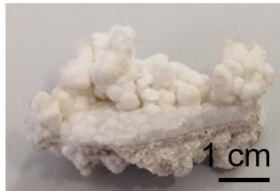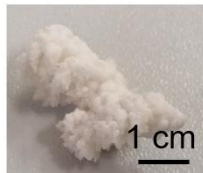

60  
61  
62

**Fig. S1d. Modern calcite-aragonite precipitates in an artificial pool in an abandoned tunnel of the Erzberg mine (Austria).**

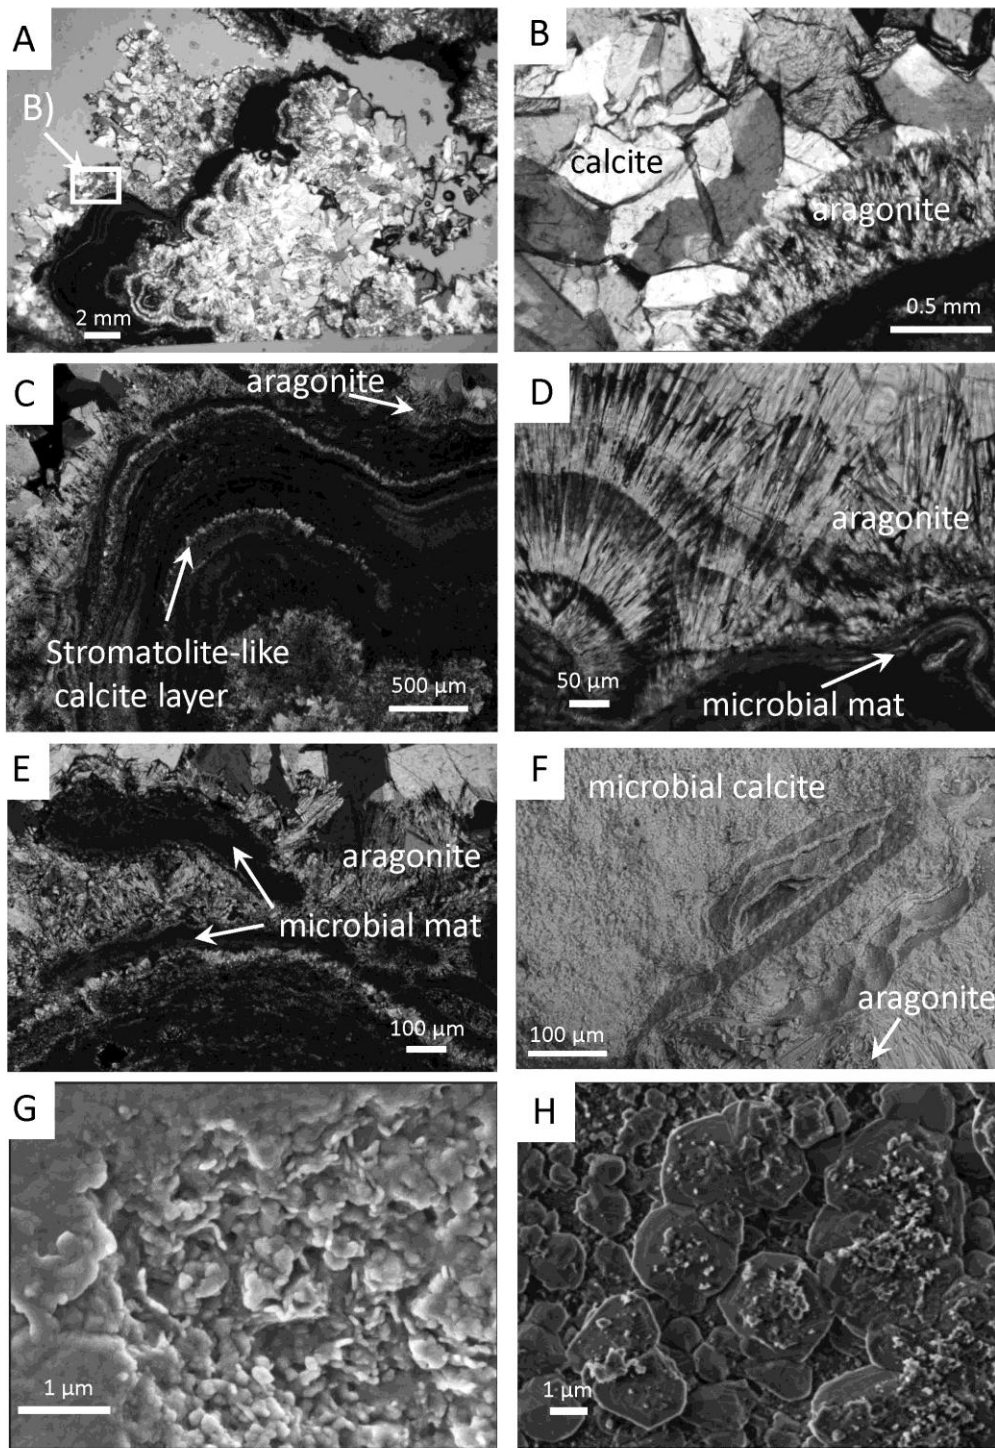

63  
 64 **Fig. S2a: Transmitted-light microscopy images (partially crossed nicols in A, crossed nicols**  
 65 **in B-E) of the topmost layer of sample L-top, Berger Károly cave and scanning electron**  
 66 **microscopic images of the boundary between aragonite and microbial calcite (F), the**  
 67 **bottom of the aragonite layer (G) and the top of the microbial calcite layer (H).**

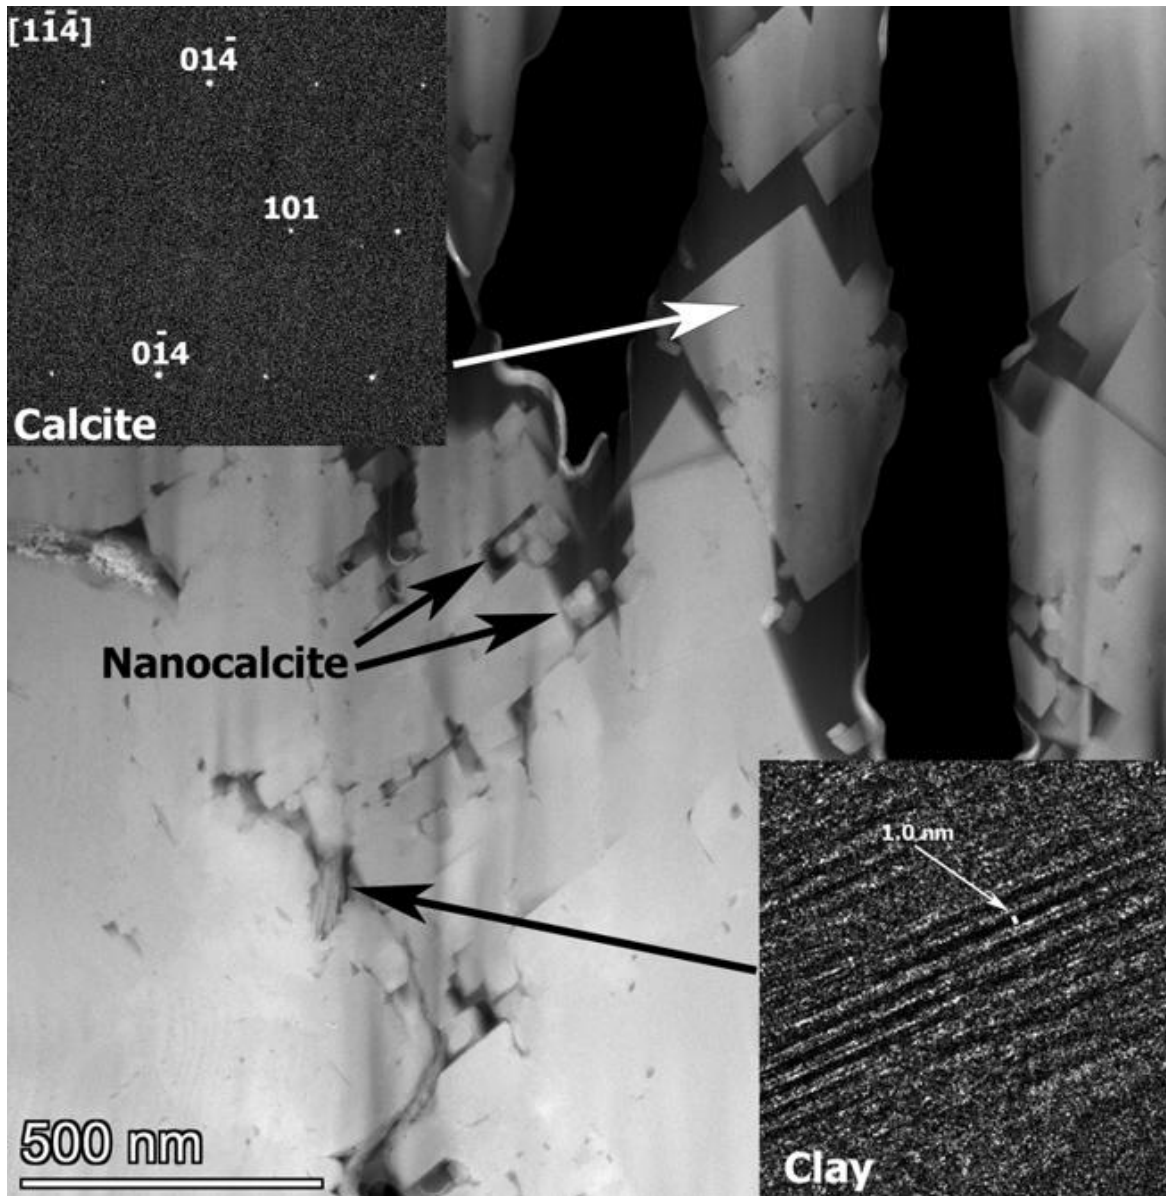

69

70 **Fig. S2b: STEM image and SAED pattern from the last-grown calcite (Berger-Károly**  
 71 **cave). The HRTEM image of the bottom right insert shows a clay mineral with 1 nm spacings.**

72

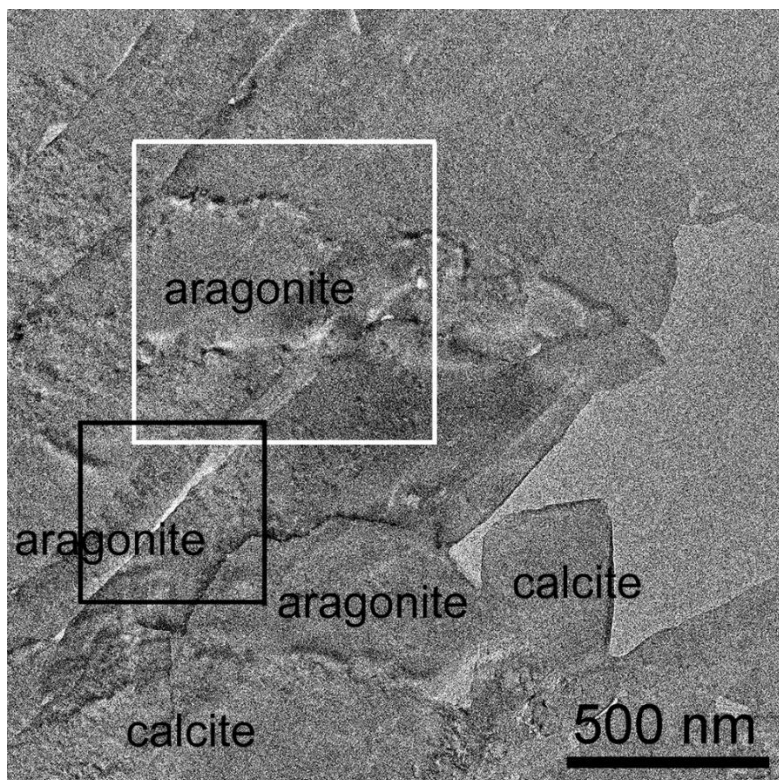

73

74 **Fig. S3: BFTEM image of the FIB lamella obtained from the calcite-aragonite boundary**  
 75 **(Berger-Károly cave).** Black and white rectangles mark the areas magnified in Fig. 2 and Fig.  
 76 S4, respectively.

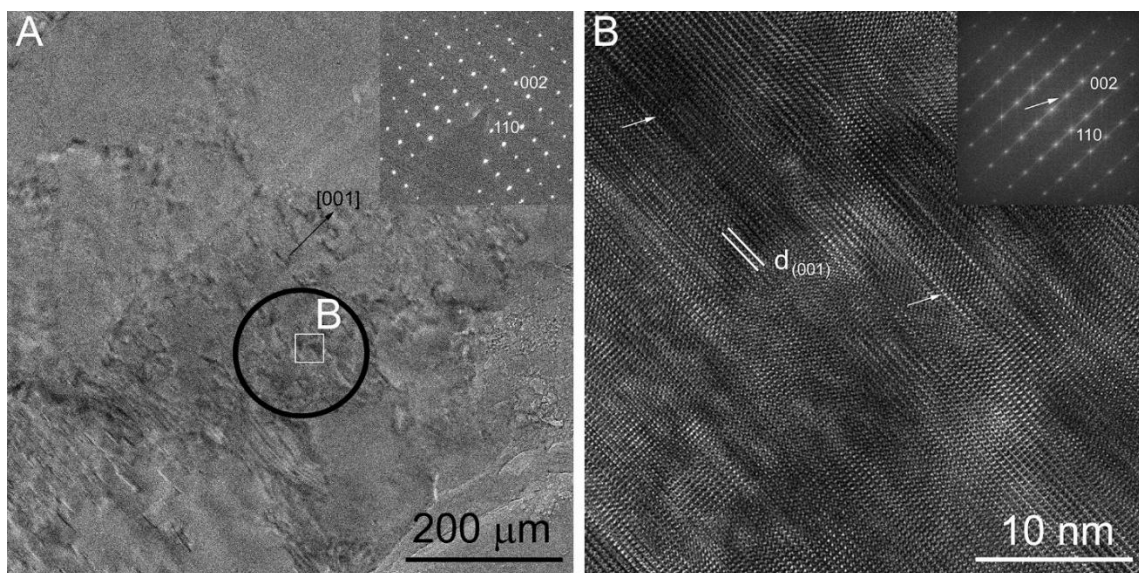

77

78 **Fig. S4: (001) aragonite SFs viewed along aragonite [1-10] (Berger Károly cave).** A: BFTEM  
 79 image obtained from the area marked by white rectangle in Fig. S3. The SAED pattern taken  
 80 from the black open circle shows aragonite viewed along [1-10]. B: HRTEM image obtained  
 81 from the area marked by the white rectangle in A.

82

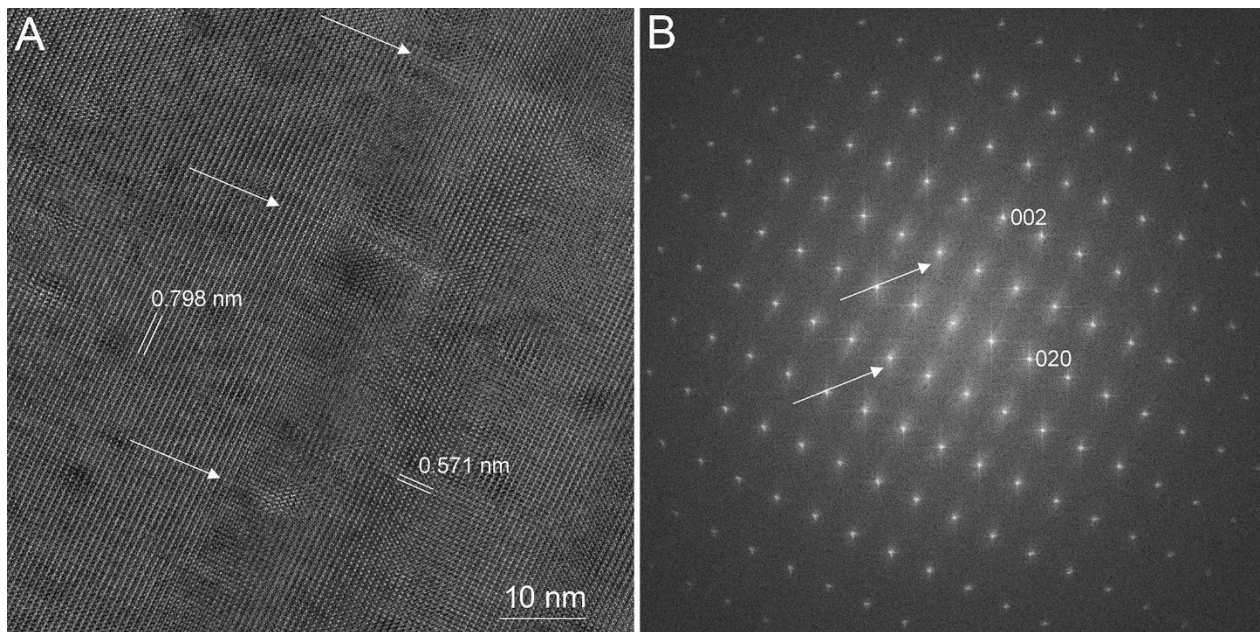

83  
 84 **Fig. S5: (001) aragonite SFs from Sonnenberg.** A: HRTEM image obtained from the area  
 85 marked by the white rectangle in Fig. 5A. B: FFT calculated from A. White arrows point to SFs  
 86 (A) and streaked reflections (B).

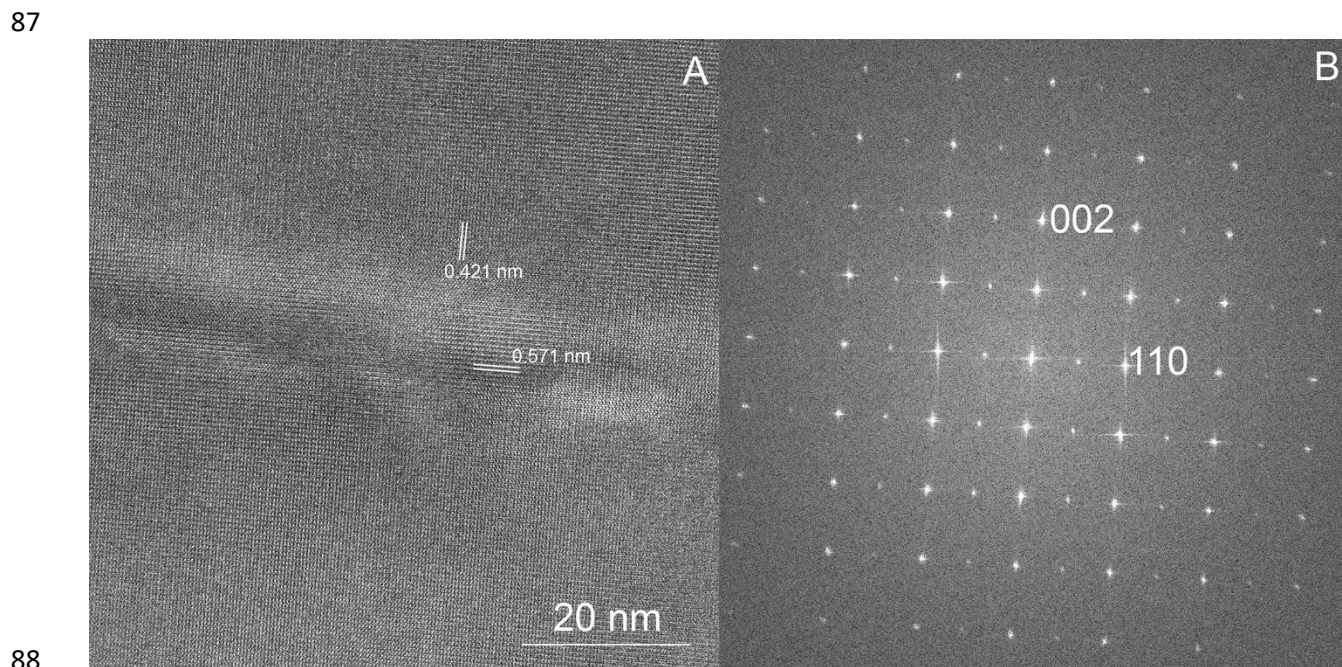

88  
 89 **Fig. S6: Defect-free aragonite from Erzberg.** A: HRTEM image obtained from the area  
 90 marked by white rectangle in Fig. 5B. FFT calculated from A. Streaked reflections are invisible  
 91 (B) and the undulating contrast of A presumably indicates a grain boundary.

92  
 93

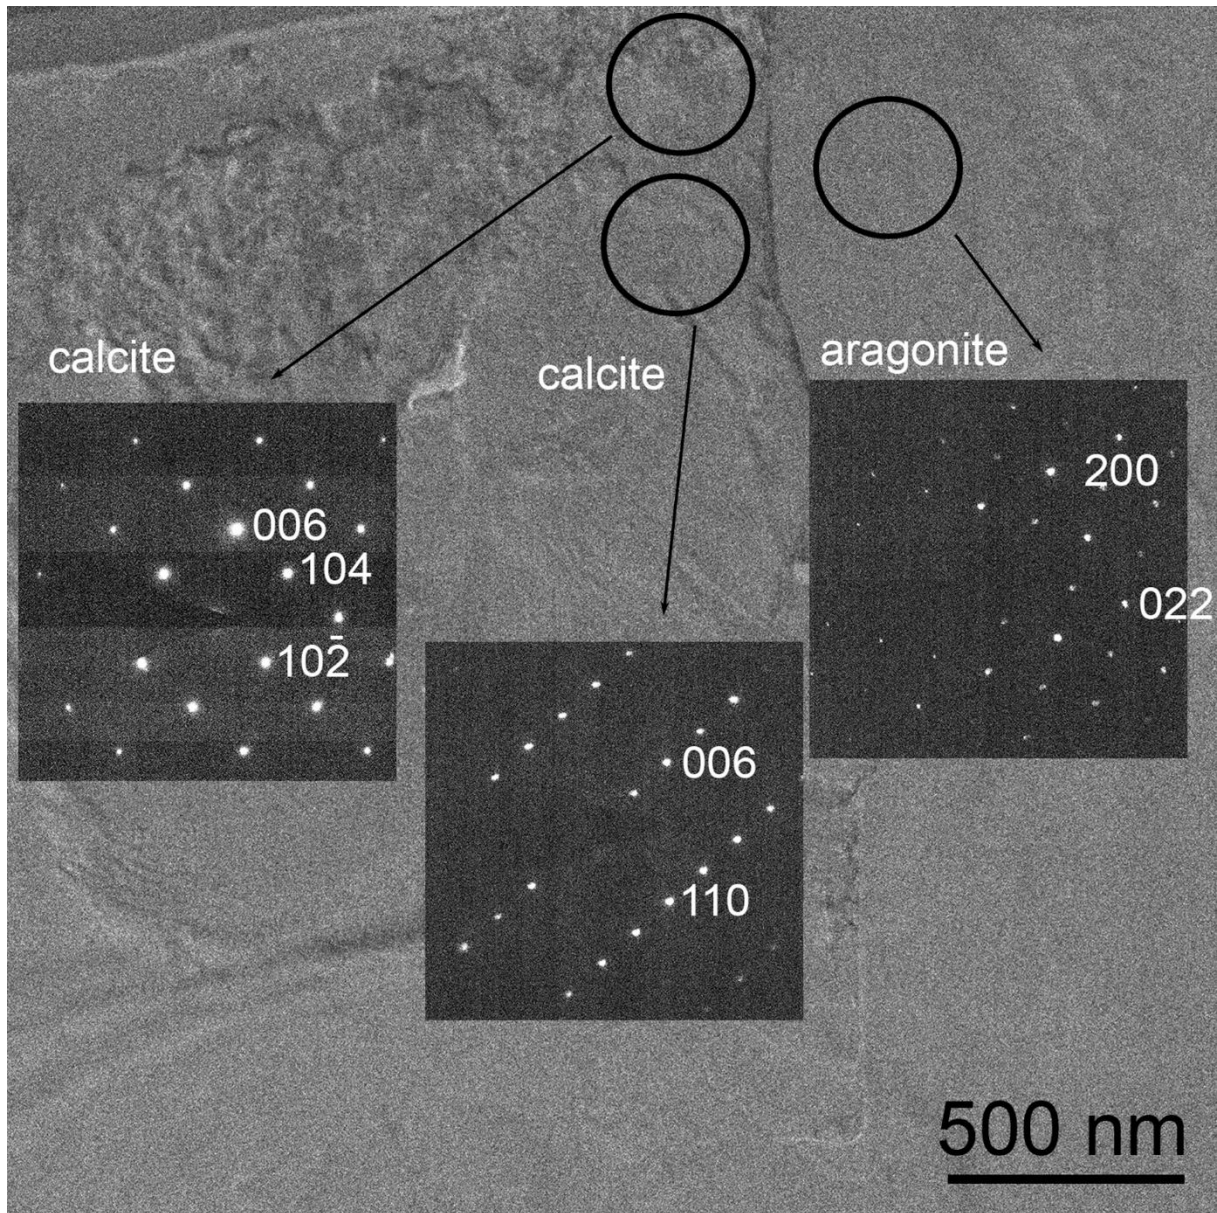

94

95 **Fig. S7: BFTEM image and SAED patterns of the first grown aragonite and last grown**  
 96 **calcite (Sonnenberg) from TEM2 lamella shown in Fig. 1E.**

97

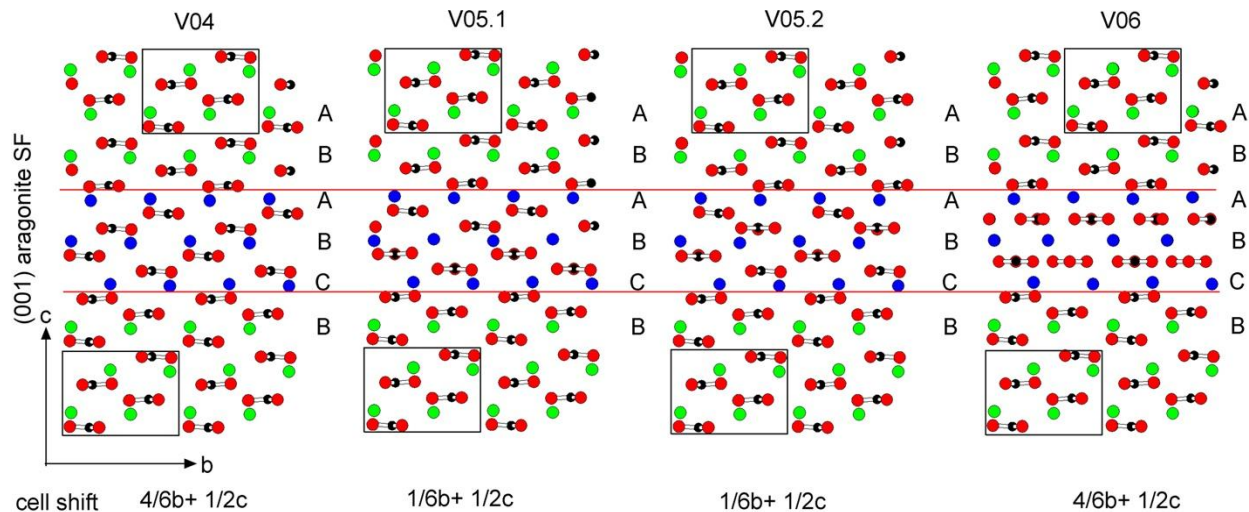

99 **Fig. S8. Starting models of a (001) aragonite SF, built by insertion of various aragonite**  
 100 **(V04.1, V05.1, V05.2) and calcite (V06) slabs.**  
 101

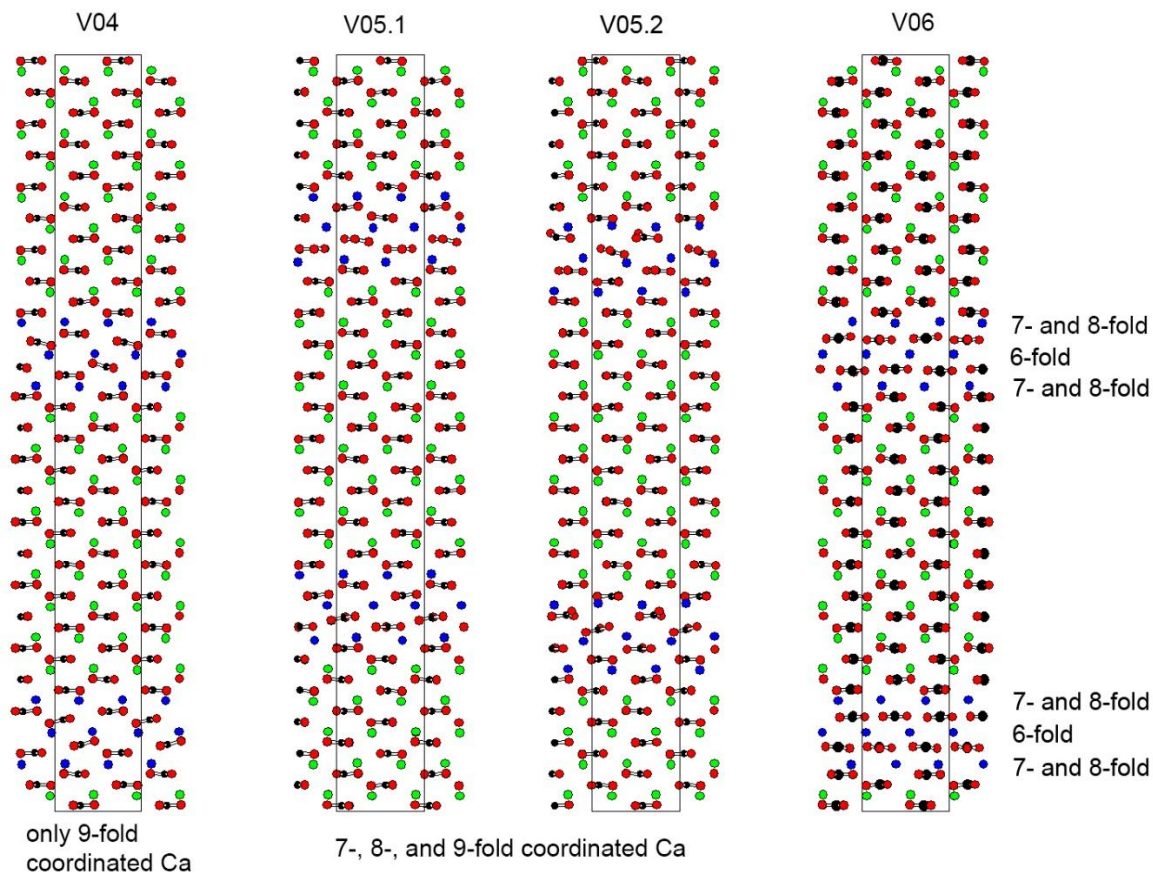

102 **Fig. S9: DFT-calculated structure models of two (001) aragonite SFs, built by insertion of**  
 103 **various aragonite (V04, V05.1, V05.2) and calcite (V06) slabs.**  
 104  
 105  
 106

107 **Supplementary Table 1. Stable carbon and oxygen isotope compositions (in ‰ relative to**  
 108 **V-PDB) of the L-top sample collected at the Berger Károly Cave<sup>14</sup>, the Sonnenberg**  
 109 **(LAS34b<sup>47</sup>) and the Erzberg<sup>15</sup> samples.**

110

|          |                            | $\delta^{13}\text{C}$ | $\delta^{18}\text{O}$ |
|----------|----------------------------|-----------------------|-----------------------|
| L-top-3  | drusy calcite              | -4.3                  | -10.8                 |
| L-top-1  | drusy calcite              | -3.0                  | -10.9                 |
| L-top-2  | drusy calcite              | -4.1                  | -10.6                 |
| L-top-4  | aragonite                  | -6.0                  | -9.2                  |
| L-top-5  | aragonite                  | -5.4                  | -9.8                  |
| L-top-6  | aragonite-calcite boundary | -2.8                  | -10.7                 |
| L-top-7  | yellow microbial calcite   | -2.6                  | -10.9                 |
| L-top-8  | yellow microbial calcite   | -2.8                  | -10.8                 |
| L-top-9  | yellow microbial calcite   | -2.7                  | -10.9                 |
| L-top-10 | yellow microbial calcite   | -3.1                  | -10.6                 |
| L-top-11 | boundary                   | -3.5                  | -8.8                  |
| L-top-12 | laminated calcite          | -2.5                  | -7.0                  |
| L-top-13 | laminated calcite          | -2.3                  | -6.7                  |
| L-top-14 | laminated calcite          | -2.6                  | -7.1                  |
| L-top-15 | boundary                   | -2.9                  | -7.8                  |
| L-top-16 | dense calcite              | -3.2                  | -8.6                  |
| L-top-17 | dense calcite              | -3.4                  | -9.0                  |
| L-top-18 | dense calcite              | -3.4                  | -9.6                  |
| LAS34b1  | aragonite                  | 4.4                   | -10.4                 |
| LAS34b2  | aragonite-calcite boundary | 2.2                   | -11.2                 |
| LAS34b3  | calcite                    | 1.0                   | -12.2                 |
| LAS34b4  | calcite                    | 1.5                   | -11.9                 |
| LAS34b5  | calcite                    | 1.9                   | -11.7                 |
| LAS34b6  | aragonite                  | 5.2                   | -10.7                 |
| Erzberg  | aragonite                  | 0.6                   | -8.0                  |

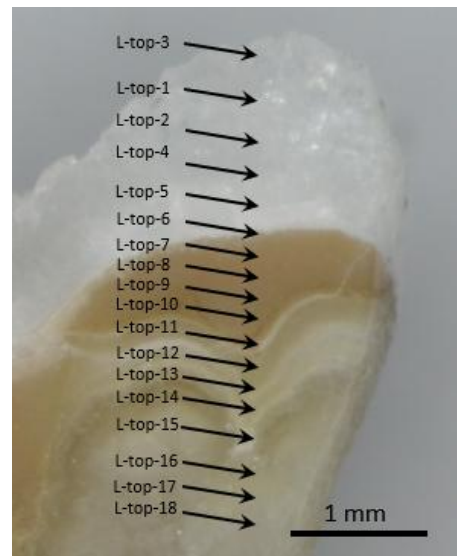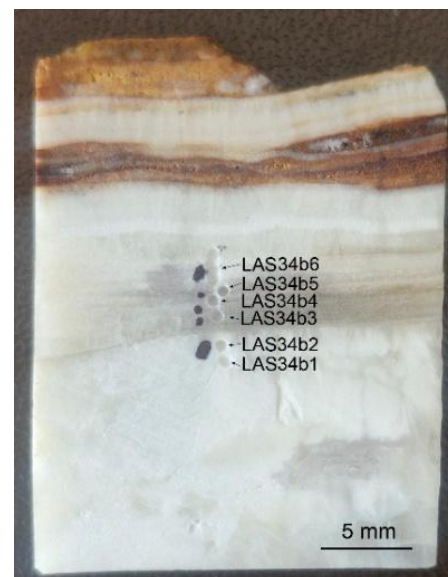

112
